# Supplementary material for: Adsorption of guanidinium collectors on aluminosilicate minerals – a density functional study
Source: Royal Society of Chemistry journal article supplement (doi:10.1039/c5cp03210e), 2015-01-01
Supplement: c5cp03210e1.pdf [file c5cp03210e1.pdf]

Electronic Supplemental Information for

“Adsorption of Guanidinium Collectors on Aluminosilicate Mineral—A  
Density Functional Study”

Naga Venkateswara Rao Nulakani<sup>a</sup>, Prathab Baskar<sup>b</sup>, Abhay Shankar Patra<sup>b</sup> and Venkatesan Subramanian<sup>a\*</sup>

<sup>†</sup>Chemical Laboratory, CSIR-Central Leather Research Institute, Adyar, Chennai - 600 020, India.

<sup>‡</sup>Research & Development, Tata Steel Limited, Jamshedpur 831 001, India.

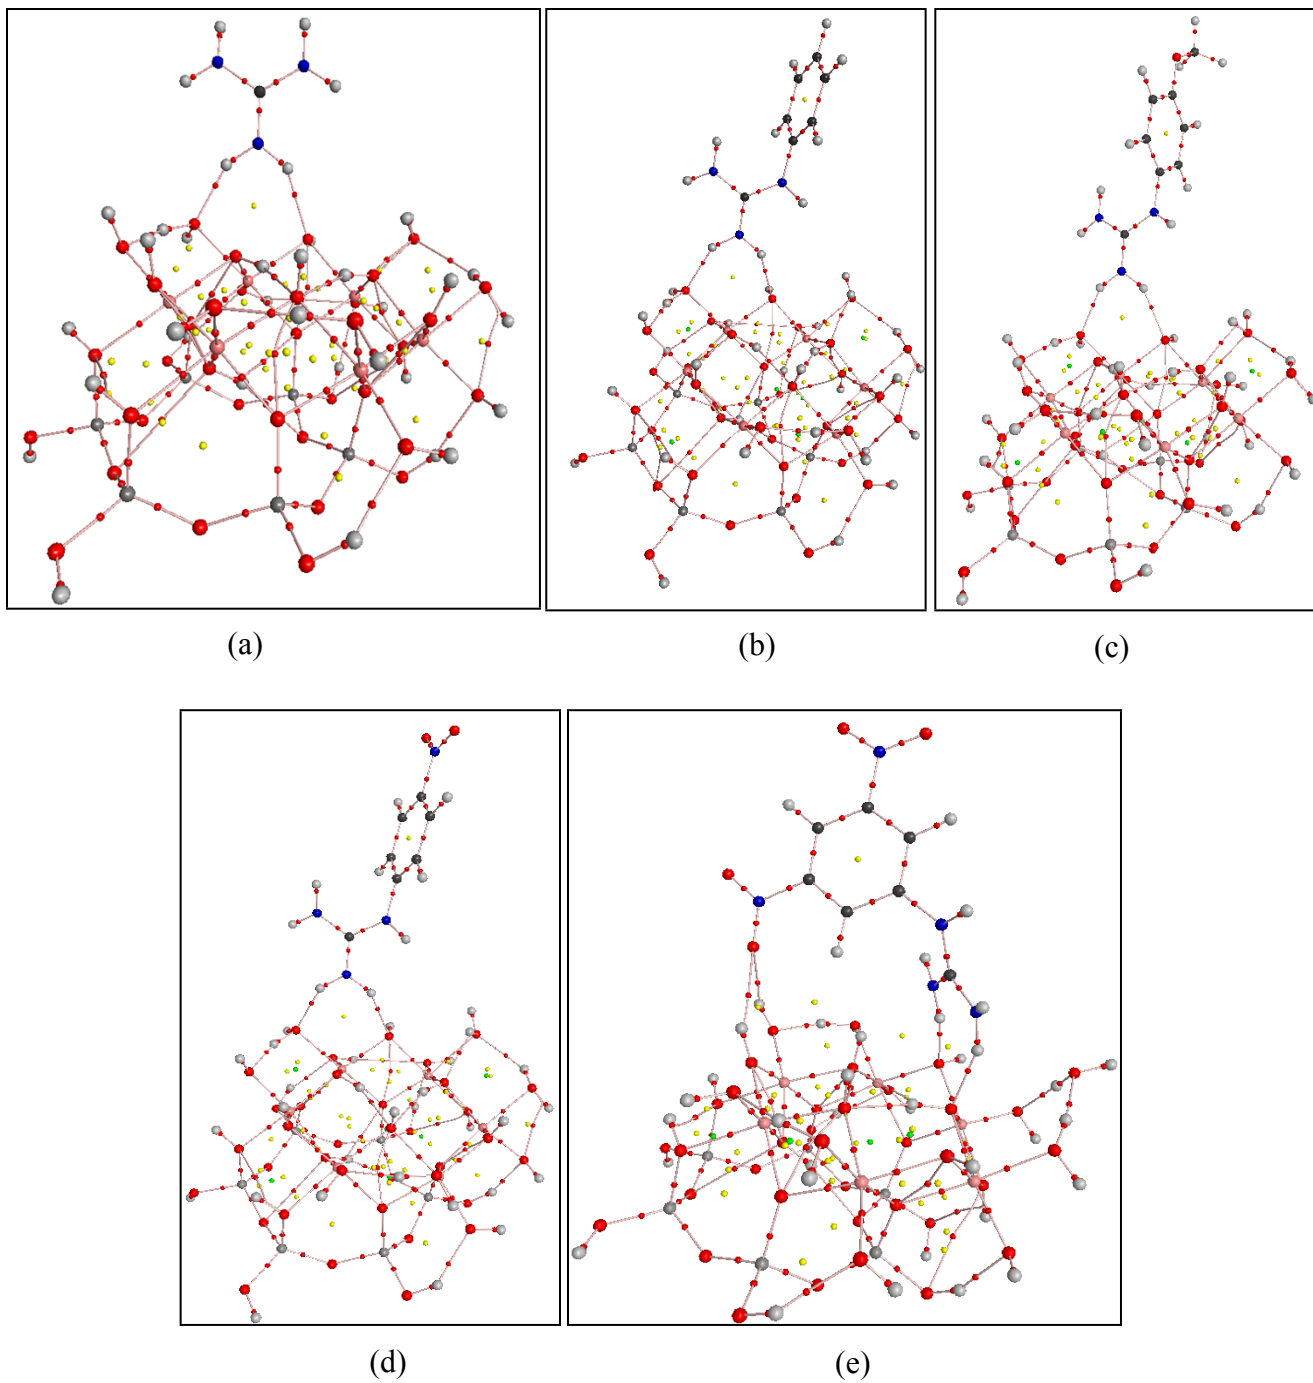

**Fig. S1.** The AIM analysis for various cationic collectors on K (a) surface in gas phase. (a) GC (b) PGC (c) MPGC (d) NPGC and (e) DNPGC.

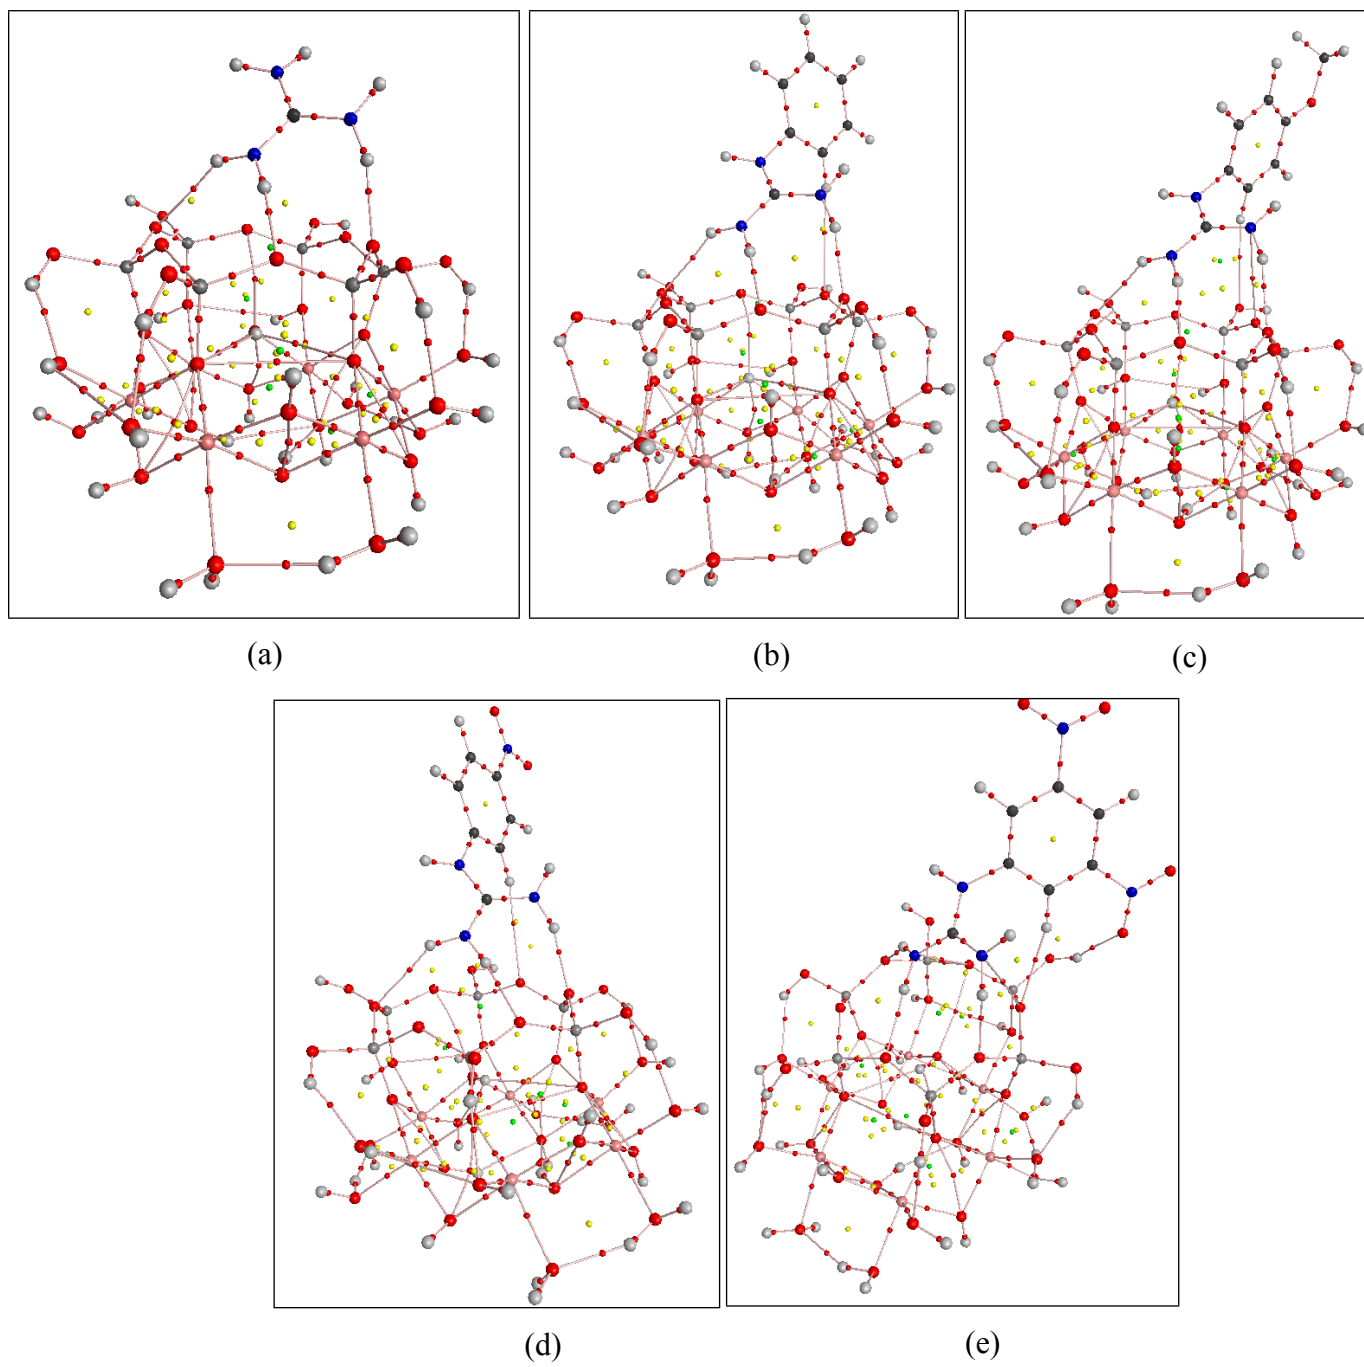

**Fig. S2.** The AIM plots of various cationic collectors on K (s) surface in gas phase. (a) GC (b) PGC (c) MPGC (d) NPGC and (e) DNPGC.

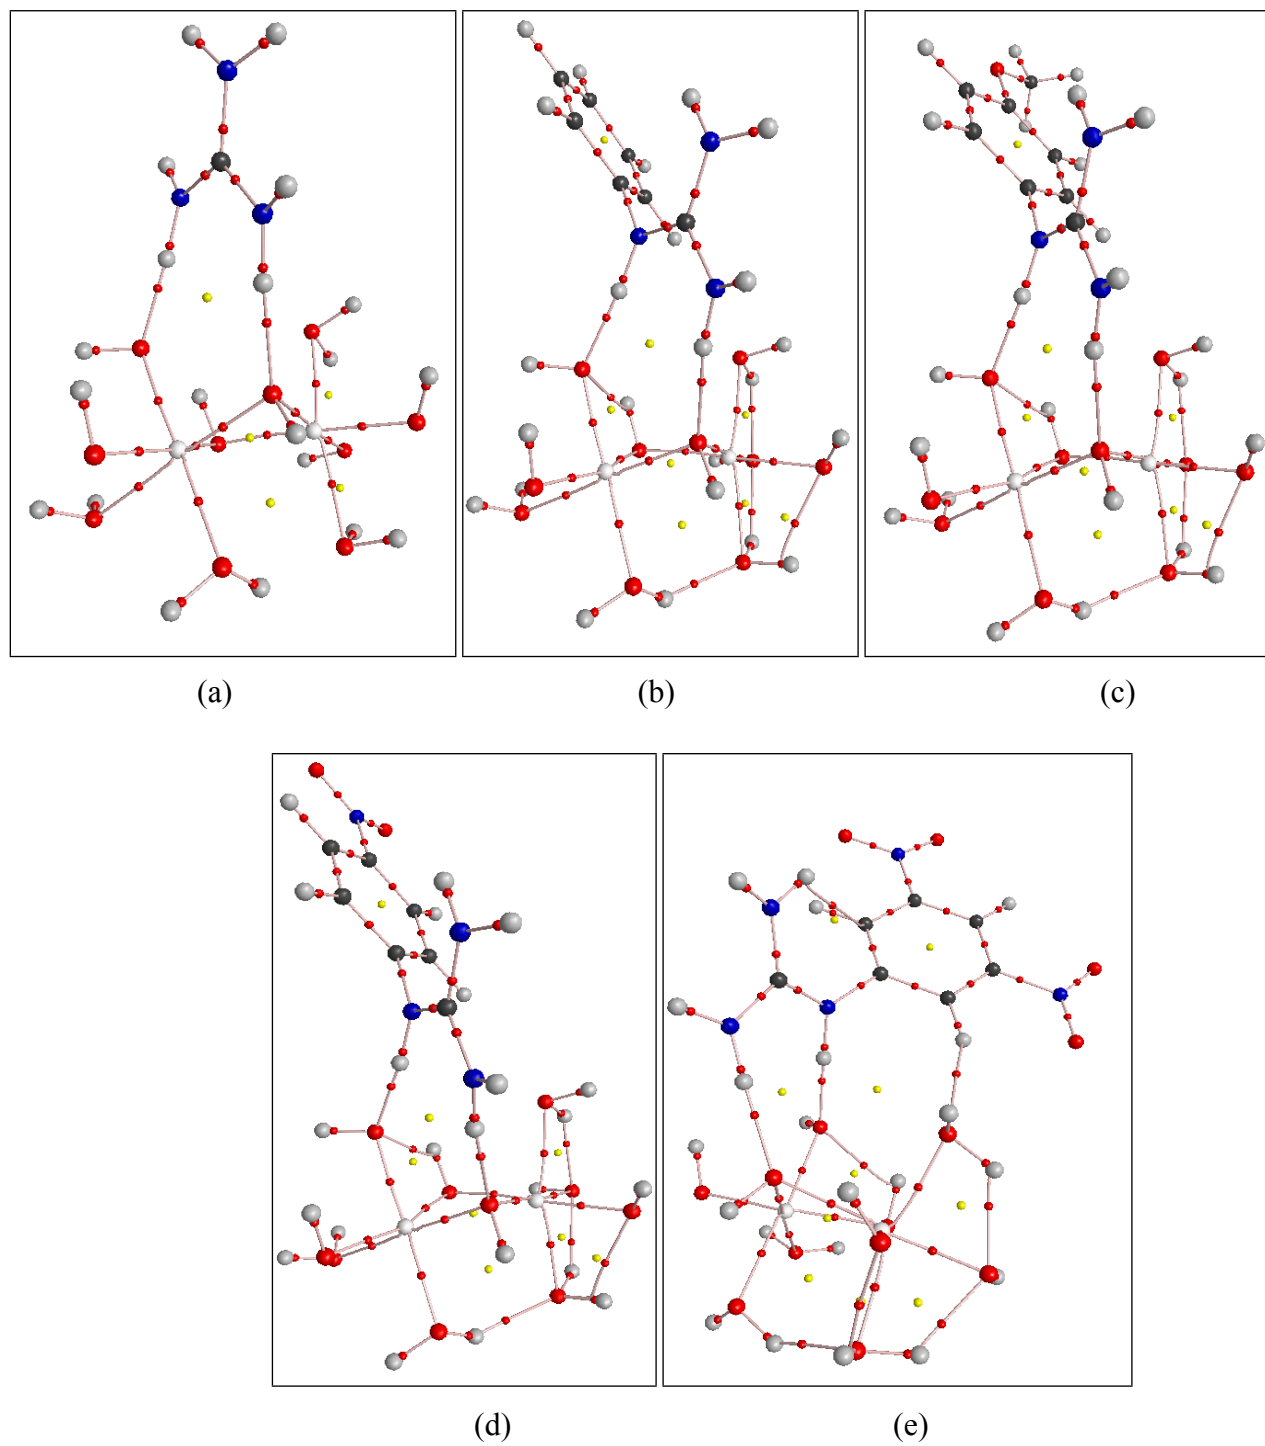

**Fig. S3.** The AIM plots of various cationic collectors on Goethite cluster in gas phase. (a) GC (b) PGC (c) MPGC (d) NPGC and (e) DNPGC.

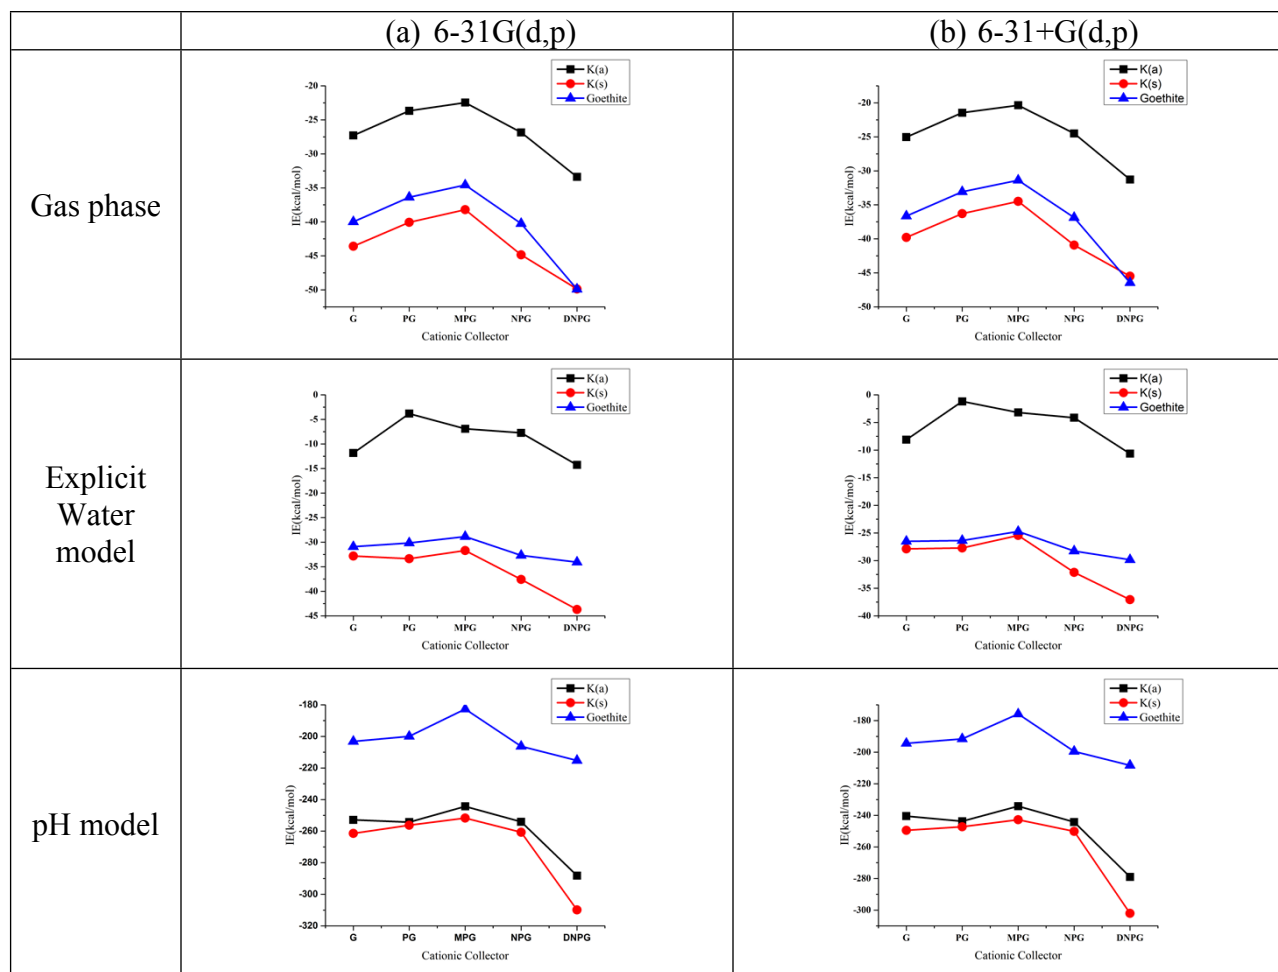

**Fig. S4.** The binding energy plots of five different guanidinium based cationic collectors on K(a), K(s) and goethite in gas phase, explicit water model and pH model calculated using (a) 6-31G(d,p) and (b) 6-31G+(d,p) basis sets.

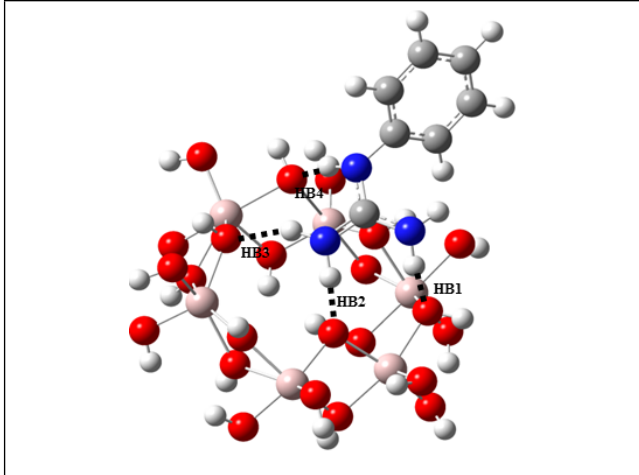

(a) PGC on K (a)

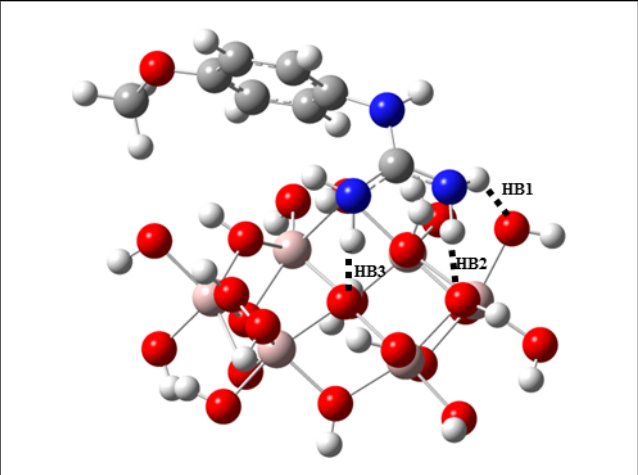

(b) MPGC on K (a)

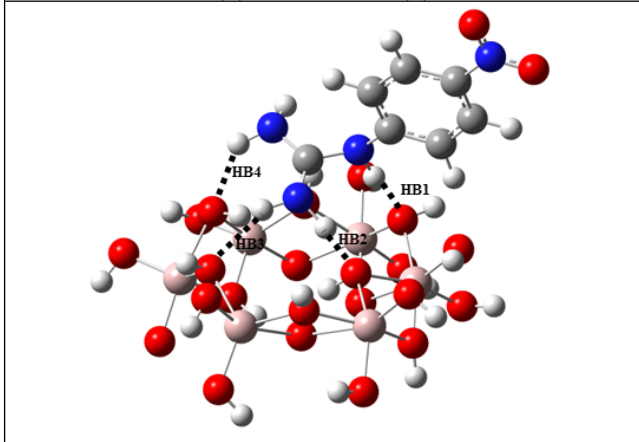

(c) NPGC on K (a)

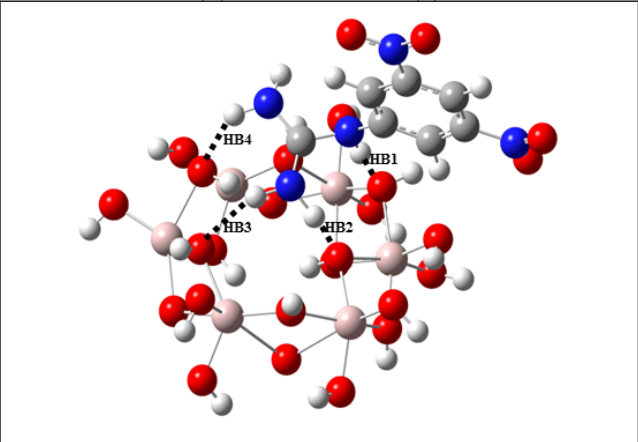

(d) DNP GC on K (a)

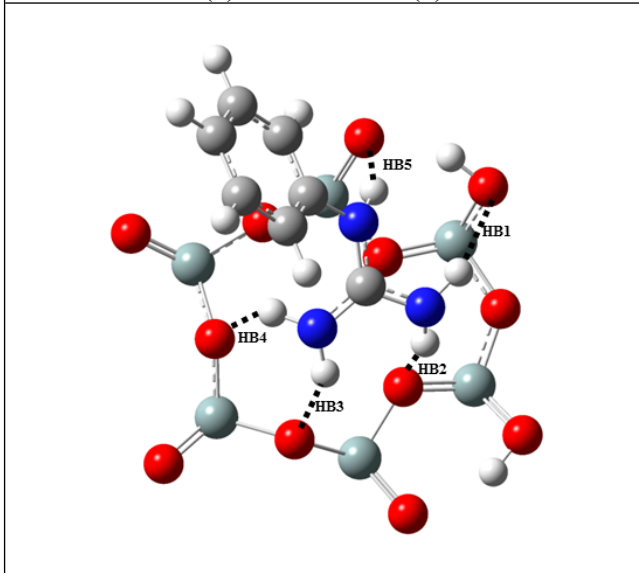

(e) PGC on K (S)

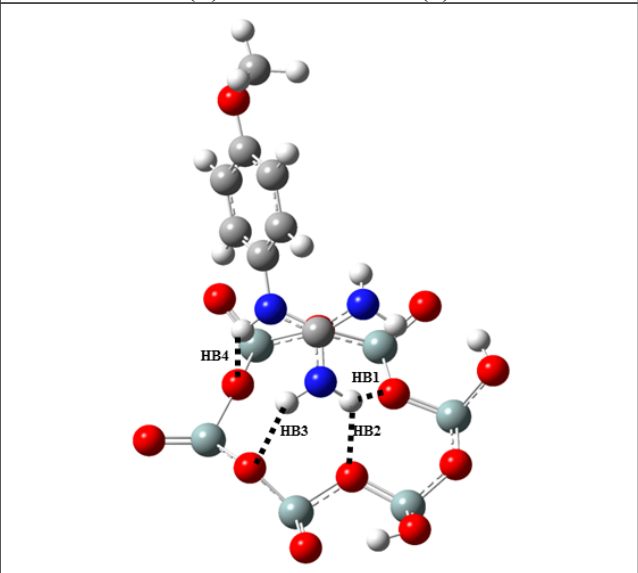

(f) MPGC on K (S)

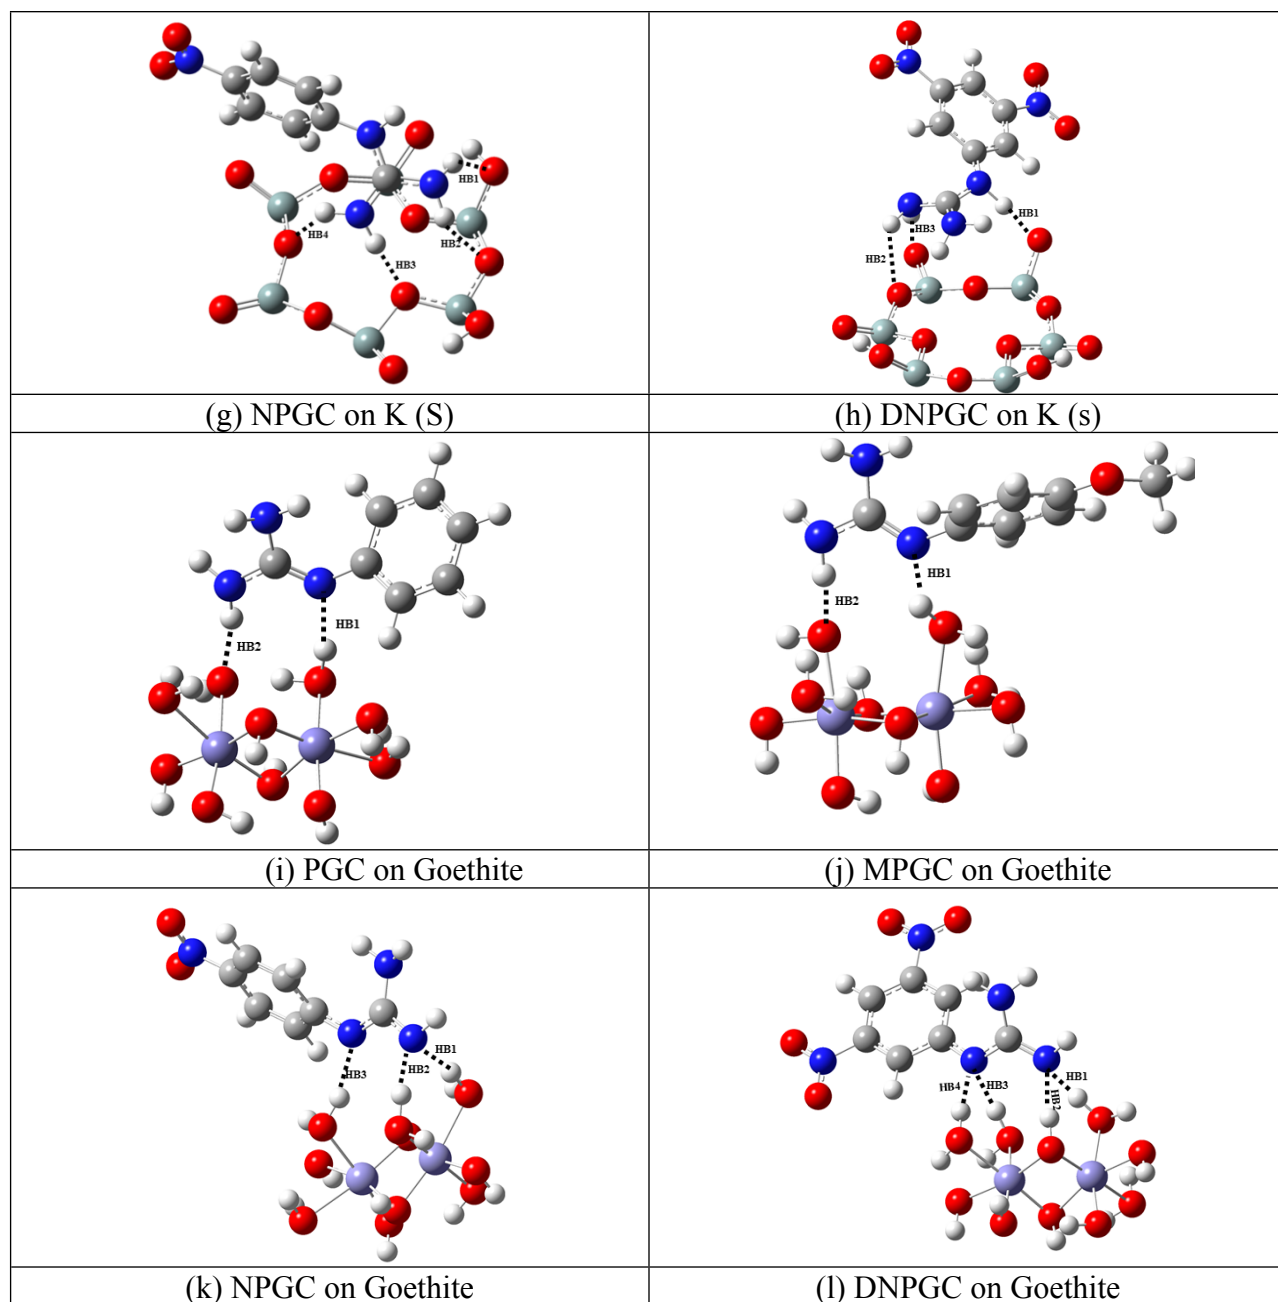

**Fig. S5.** The optimized geometries of four cationic collectors (PGC, MPGC, NPGC and DNPGC) on three inorganic mineral surfaces in pH mode.
